# Supplementary material for: Phospholipid homeostasis, membrane tenacity and survival of Mtb in lipid rich conditions is determined by MmpL11 function
Source: PubMed Central journal article supplement (PMC5974182; doi:10.1038/s41598-018-26710-z), 2018-05-29
Supplement: 41598_2018_26710_MOESM1_ESM.pdf [file 41598_2018_26710_MOESM1_ESM.pdf]

Phospholipid homeostasis, membrane tenacity and survival of Mtb in lipid rich conditions is determined by MmpL11 function

Ankur Bothra<sup>1</sup>, Prabhakar Arumugam<sup>1</sup>, Vipul Panchal<sup>1</sup>, Dilip Menon<sup>1</sup>, Sonali Srivastava<sup>1</sup>, Deepthi Shankaran<sup>1</sup>, Ananya Nandy<sup>1</sup>, Neetika Jaisinghani<sup>1</sup>, Archana Singh<sup>1</sup>, Rajesh S. Gokhale<sup>1,2,+</sup>, Sheetal Gandotra<sup>1,2</sup>, Vivek Rao<sup>1,2,\*</sup>

<sup>1</sup>CSIR- Institute of genomics and Integrative Biology, New Delhi-110025, India

<sup>2</sup>Academy of Scientific and Innovative Research, CSIR-Central Road Research Institute, New Delhi-110025, India (AcSIR)

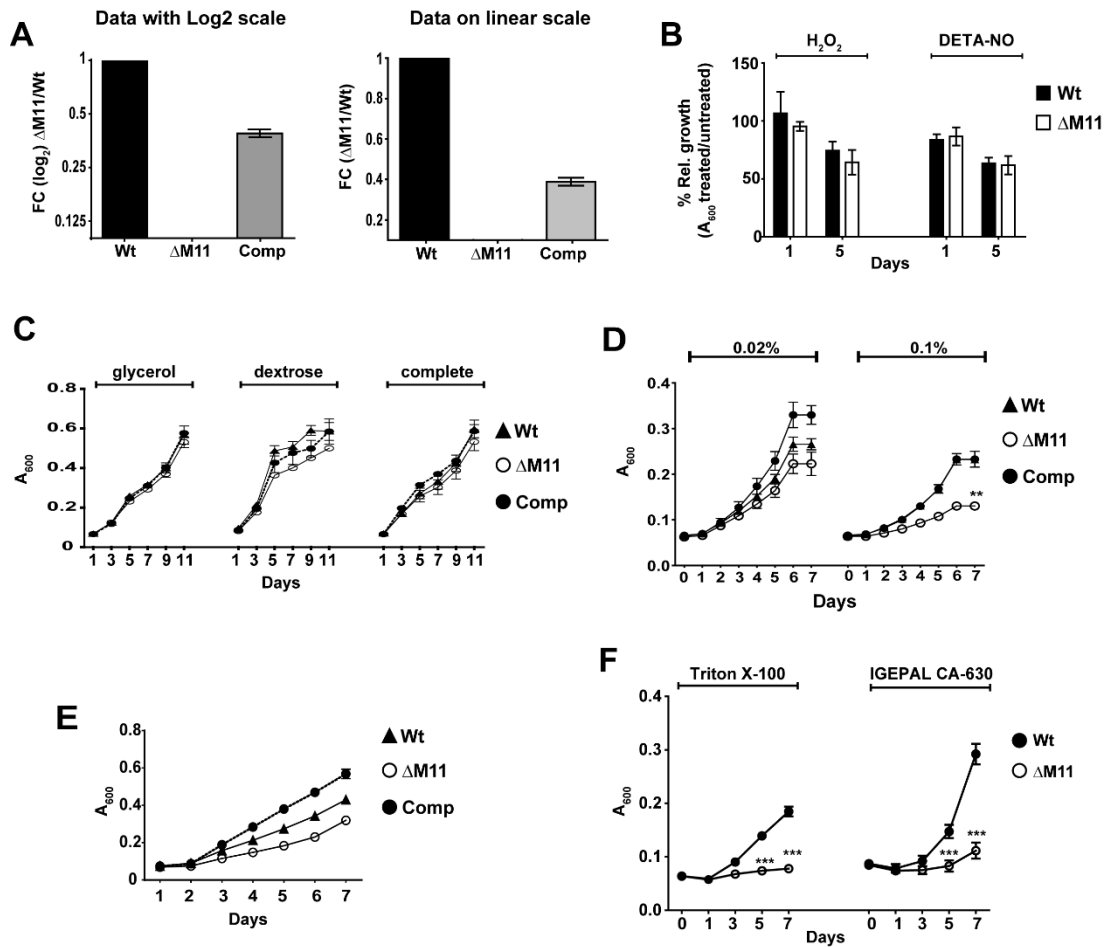

Figure S1

**Fig. S1:** A) Analysis of *mmpL11* expression in Wt,  $\Delta$ M11, Comp by qPCR. Gene expression normalised to *rpoB* is plotted as mean  $\pm$  SD. B-E) Growth of the Mtb strains in 7H9 media- (B) containing 0.5% glycerol or 0.5% dextrose or in complete media containing ADC, (C) after treatment with H<sub>2</sub>O<sub>2</sub> or DETA-NO for 24 and 120 hrs. (D) containing 0.02% or 0.1% Tyloxapol and (E) containing 0.05% Tyloxapol + ADC. F) Growth of Wt and  $\Delta$ M11 in 7H9 media containing 0.005% Triton X-100 and 0.05% IGEPAL CA-630 as indicated. Values are plotted as mean of triplicate values  $\pm$  SD for one representative experiment of n=2 or 3

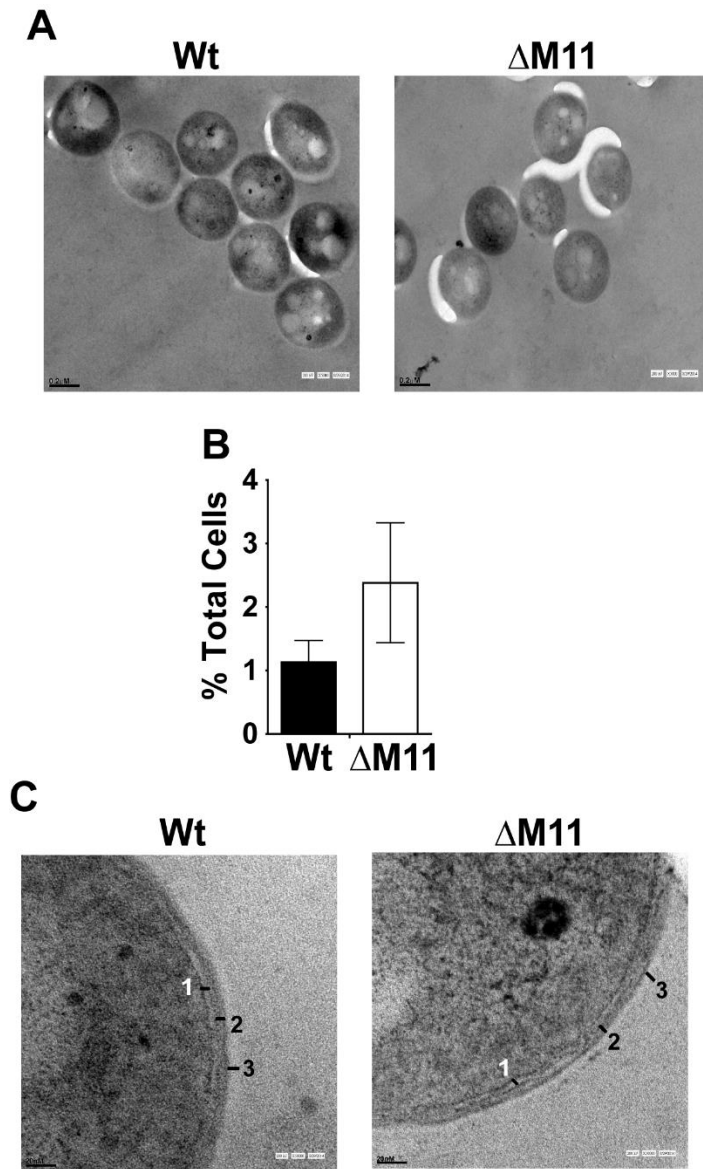

**Fig. S2:** A, C) Morphology of Wt and  $\Delta$ M11 strains grown in 0.05% Tween 80 containing media in TEM. Representative images from 3 independent experiments and Scale bars of 0.2  $\mu$ m and 20 nm are indicated. (B) Quantitation of deformed cells in multiple images of Wt and  $\Delta$ M11 is graphically represented as mean  $\pm$  SD.

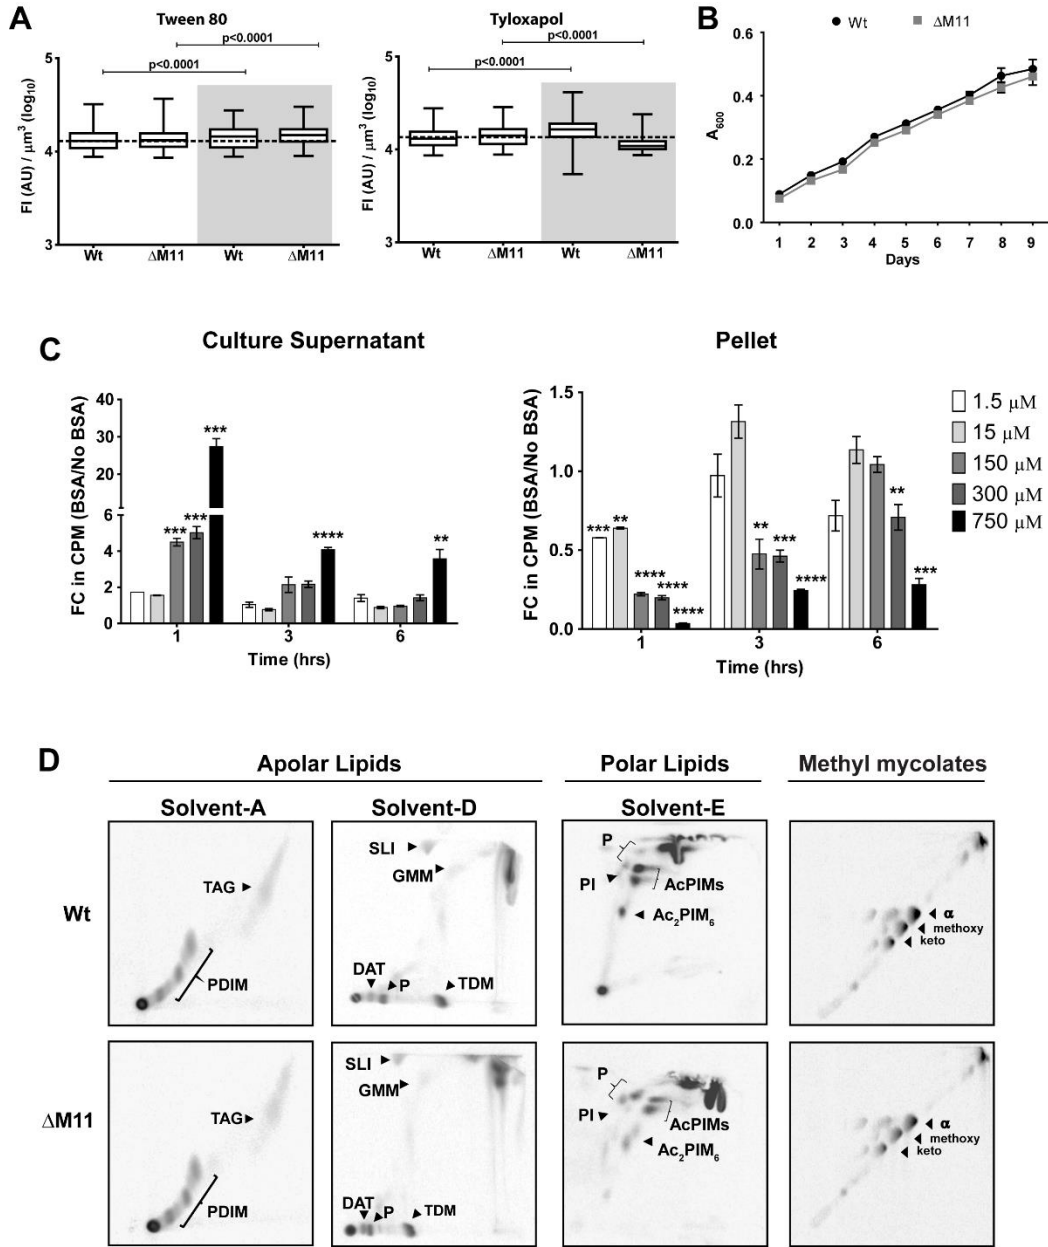

Fig.S3

**Fig. S3:** A) Quantitation of CL in Wt and  $\Delta M11$  logarithmic cultures grown in the presence of 0.05% Tween 80 or 0.05% Tyloxapol. The mean fluorescence intensities at 529nm and 605nm (shaded area) are shown. B) Growth of Wt and  $\Delta M11$  Mtb in media supplemented with 5% surfactant for 9 days is represented as mean OD  $\pm$  SD of one representative experiment of n=3. (C) Fatty acid quenching by bovine serum albumin (BSA). Proportion of fatty acid obtained in

culture supernatant containing different concentrations of BSA (in  $\mu\text{M}$ ) and the bacterial pellet in the respective media are represented as fold change (FC) relative to no BSA containing media at different time intervals of incubation at  $37^\circ\text{C}$ . (D) 2D-TLC of  $^{14}\text{C}$ -acetate labelled Mtb lipids from logarithmic cultures of Wt and  $\Delta\text{M11}$ . The apolar lipids were resolved with Solvent-A or D while the polar lipids were resolved in solvent-E. Individual lipid species are depicted in the images, PDIM- phthiocerol dimycocerosate, SL1- mature sulfolipid, GMM- glucose monomycolate, DAT- diacyl trehalose, TDM- trehalose dimycolate, P-polar lipids, Ac-PIM- acylated phosphatidyl inositol mannosides. MAMEs and FAMEs were analysed by 2D-TLC with argentation. Individual lipid species are depicted in the images,  $\alpha$ - alpha mycolates.

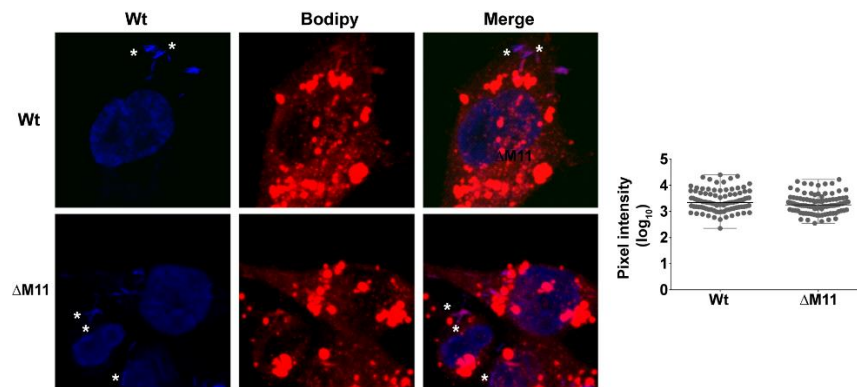

**Fig. S4:** Estimation of fluorescently labelled BODIPY™ 558/568 C12 fatty acid by Mtb strains in THP1 macrophages (A). The total intensities for 100 bacteria (ROI) was quantitated and is represented graphically (B).
